# Supplementary material for: The Efficacy of a Cosmetic Preparation Containing Sheep Colostrum on Mature Skin: A Randomized Placebo-Controlled Double-Blind Study
Source: MDPI journal article supplement (doi:10.3390/app14072862), 2024-03-28

**Figure S1.** Exemplary pictures of subjects before (left) and after (right) eight weeks of using the colostrum cream.

The arrows show the area of skin where the measurements were taken.

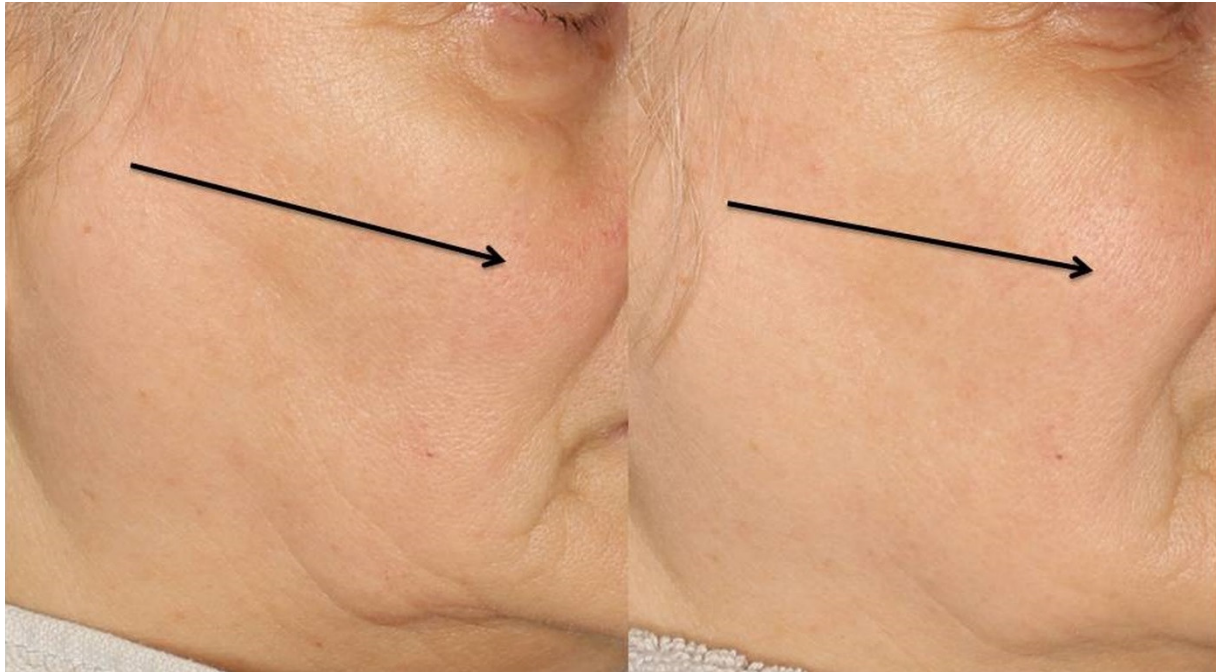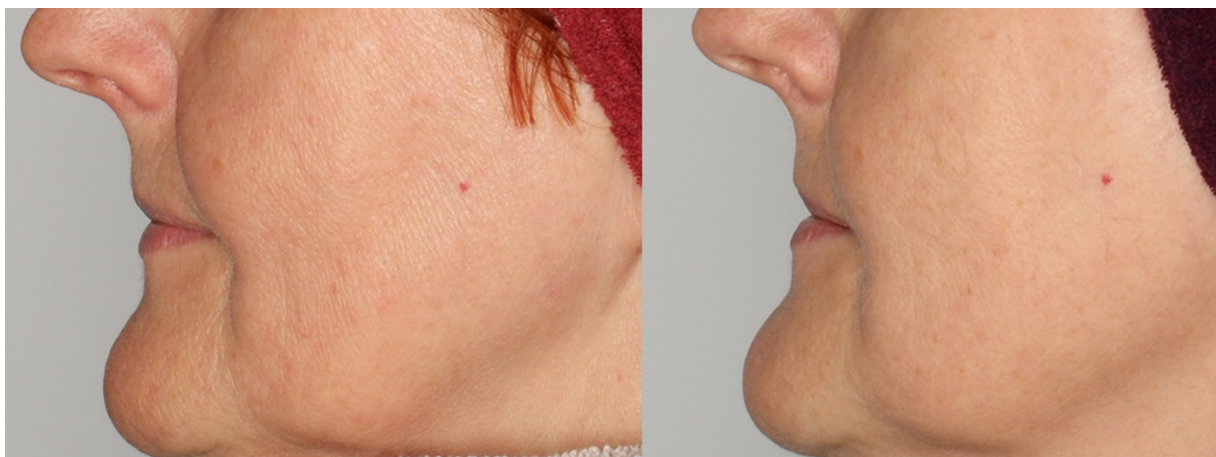

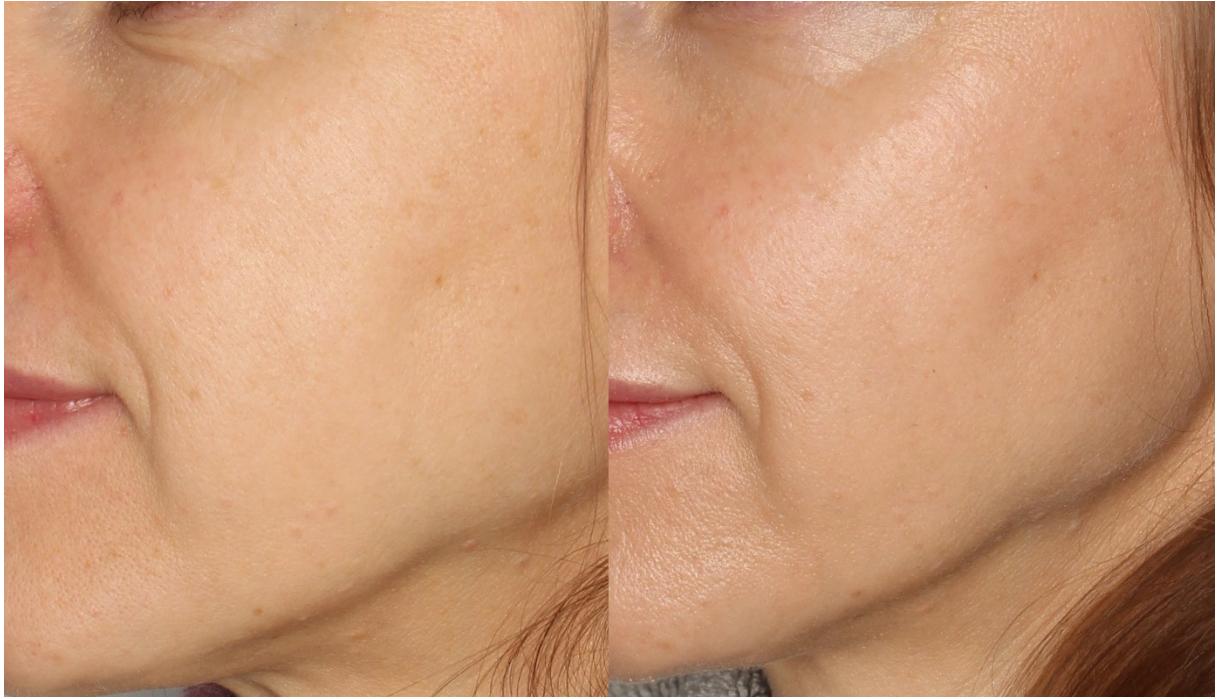

Supplement: s1 [file s1]
